# Supplementary material for: Multi-Variable Governance Index Modeling of Government’s Policies, Legal and Institutional Strategies, and Management for Climate Compatible and Sustainable Agriculture Development
Source: MDPI journal article supplement (doi:10.3390/su141811763), 2022-09-19
Supplement: s1 [file s1]

Archive with 2 entries (2 files):
- File S1-principles & Indicators-GC1Agriculture-KJ-10May21.pdf
- File S2-GC1-AgricultureCCD9Aug22.pdf
