# Supplementary material for: Multi-Variable Governance Index Modeling of Government’s Policies, Legal and Institutional Strategies, and Management for Climate Compatible and Sustainable Agriculture Development
Source: MDPI journal article supplement (doi:10.3390/su141811763), 2022-09-19
Supplement: s1 [file s1 › File S2-GC1-AgricultureCCD9Aug22.pdf]

## File S2

### Supplementary Material for

### **Multi-variable governance index modelling of government's policies, legal, institutional strategies and management for climate compatible and sustainable agriculture development**

**Kanwar Muhammad Javed Iqbal et al**

**Table S3:** Summary of Constituency based KW Test for GC-1 sample in Agriculture Sector

| <b>Hypothesis Test Summary</b> |                                                                                                           |                                         |             |                             |
|--------------------------------|-----------------------------------------------------------------------------------------------------------|-----------------------------------------|-------------|-----------------------------|
|                                | <b>Null Hypothesis</b>                                                                                    | <b>Test</b>                             | <b>Sig.</b> | <b>Decision</b>             |
| 1                              | The distribution of DRR, Vulnerability and Spatial Mapping is the same across categories of Constituency. | Independent-Samples Kruskal-Wallis Test | .000        | Reject the null hypothesis. |
| 2                              | The distribution of Regulation of Rights is the same across categories of Constituency.                   | Independent-Samples Kruskal-Wallis Test | .000        | Reject the null hypothesis. |
| 3                              | The distribution of Climate Smart Practices is the same across categories of Constituency.                | Independent-Samples Kruskal-Wallis Test | .000        | Reject the null hypothesis. |
| 4                              | The distribution of Technological Innovation is the same across categories of Constituency.               | Independent-Samples Kruskal-Wallis Test | .000        | Reject the null hypothesis. |
| 5                              | The distribution of Climate Organization is the same across categories of Constituency.                   | Independent-Samples Kruskal-Wallis Test | .000        | Reject the null hypothesis. |
| 6                              | The distribution of Institutional Effectiveness is the same across categories of Constituency.            | Independent-Samples Kruskal-Wallis Test | .000        | Reject the null hypothesis. |
| 7                              | The distribution of Climate Infrastructure is the same across categories of Constituency.                 | Independent-Samples Kruskal-Wallis Test | .000        | Reject the null hypothesis. |
| 8                              | The distribution of Agriculture, Water and Energy Nexus is the same across categories of Constituency.    | Independent-Samples Kruskal-Wallis Test | .000        | Reject the null hypothesis. |
| 9                              | The distribution of Sustainability is the same across categories of Constituency.                         | Independent-Samples Kruskal-Wallis Test | .000        | Reject the null hypothesis. |

*Asymptotic significances are displayed. The significance level is .05. N = 357*

**Table S4:** Summary of Gender based KW Test for GC-1 sample in Agriculture Sector

| <b>Hypothesis Test Summary</b> |                                                                                                     |                                         |             |                             |
|--------------------------------|-----------------------------------------------------------------------------------------------------|-----------------------------------------|-------------|-----------------------------|
|                                | <b>Null Hypothesis</b>                                                                              | <b>Test</b>                             | <b>Sig.</b> | <b>Decision</b>             |
| 1                              | The distribution of DRR, Vulnerability and Spatial Mapping is the same across categories of Gender. | Independent-Samples Kruskal-Wallis Test | .000        | Reject the null hypothesis. |
| 2                              | The distribution of Regulation of Rights is the same across categories of Gender.                   | Independent-Samples Kruskal-Wallis Test | .000        | Reject the null hypothesis. |
| 3                              | The distribution of Climate Smart Practices is the same across categories of Gender.                | Independent-Samples Kruskal-Wallis Test | .000        | Reject the null hypothesis. |
| 4                              | The distribution of Technological Innovation is the same across categories of Gender.               | Independent-Samples Kruskal-Wallis Test | .000        | Reject the null hypothesis. |
| 5                              | The distribution of Climate Organization is the same across categories of Gender.                   | Independent-Samples Kruskal-Wallis Test | .000        | Reject the null hypothesis. |
| 6                              | The distribution of Institutional Effectiveness is the same across categories of Gender.            | Independent-Samples Kruskal-Wallis Test | .000        | Reject the null hypothesis. |

|   |                                                                                                  |                                         |      |                             |
|---|--------------------------------------------------------------------------------------------------|-----------------------------------------|------|-----------------------------|
| 7 | The distribution of Climate Infrastructure is the same across categories of Gender.              | Independent-Samples Kruskal-Wallis Test | .045 | Reject the null hypothesis. |
| 8 | The distribution of Agriculture, Water and Energy Nexus is the same across categories of Gender. | Independent-Samples Kruskal-Wallis Test | .000 | Reject the null hypothesis. |
| 9 | The distribution of Sustainability is the same across categories of Gender.                      | Independent-Samples Kruskal-Wallis Test | .001 | Reject the null hypothesis. |

*Asymptotic significances are displayed. The significance level is .05. N = 357*

**Table S5:** Summary of Correlations between CCD Criteria for GC-1 in Agriculture Sector

| Pearson Correlations |        |        |        |        |        |        |        |        |       |
|----------------------|--------|--------|--------|--------|--------|--------|--------|--------|-------|
| CCD Criteria         | AC1.1  | AC2.1  | AC3.1  | AC4.1  | AC5.1  | AC6.1  | AC7.1  | AC8.1  | AC9.1 |
| AC1.1                | 1      |        |        |        |        |        |        |        |       |
| AC2.1                | .831** | 1      |        |        |        |        |        |        |       |
| AC3.1                | .884** | .855** | 1      |        |        |        |        |        |       |
| AC4.1                | .872** | .871** | .927** | 1      |        |        |        |        |       |
| AC5.1                | .914** | .892** | .932** | .943** | 1      |        |        |        |       |
| AC6.1                | .901** | .786** | .902** | .877** | .895** | 1      |        |        |       |
| AC7.1                | .723** | .561** | .788** | .798** | .740** | .741** | 1      |        |       |
| AC8.1                | .857** | .863** | .817** | .885** | .871** | .805** | .694** | 1      |       |
| AC9.1                | .815** | .842** | .766** | .770** | .828** | .811** | .447** | .727** | 1     |

**\*\*:** Correlation is significant at the 0.01 level (1-tailed), N = 357.

**Table S6:** Regression Model Summary for GC-1 of Agriculture Sector

| Model Summary <sup>b</sup> |                   |          |                   |                            |
|----------------------------|-------------------|----------|-------------------|----------------------------|
| Model                      | R                 | R Square | Adjusted R Square | Std. Error of the Estimate |
| 1                          | .915 <sup>a</sup> | .837     | .833              | .42868                     |

a. Predictors: (Constant), Agriculture, Water and Energy Nexus, Climate Infrastructure, Institutional Effectiveness, Regulation of Rights, DRR, Vulnerability and Spatial Mapping, Climate Smart Practices, Technological Innovation, Climate Organization

b. Dependent Variable: Sustainability

**Table S7:** ANOVA Summary for GC-1 of Agriculture Sector

| ANOVA <sup>a</sup> |            |                |     |             |         |                   |
|--------------------|------------|----------------|-----|-------------|---------|-------------------|
| Model              |            | Sum of Squares | df  | Mean Square | F       | Sig.              |
| 1                  | Regression | 327.901        | 8   | 40.988      | 223.037 | .000 <sup>b</sup> |
|                    | Residual   | 63.952         | 348 | .184        |         |                   |
|                    | Total      | 391.853        | 356 |             |         |                   |

a. Dependent Variable: Sustainability

b. Predictors: (Constant), Agriculture, Water and Energy Nexus, Climate Infrastructure, Institutional Effectiveness, Regulation of Rights, DRR, Vulnerability and Spatial Mapping, Climate Smart Practices, Technological Innovation, Climate Organization

**Table S8:** Summary of Regression Coefficients for GC-1 of Agriculture Sector

| Coefficients <sup>a</sup> |                                        |                             |            |                           |        |       |                         |                         |        |
|---------------------------|----------------------------------------|-----------------------------|------------|---------------------------|--------|-------|-------------------------|-------------------------|--------|
| Model                     |                                        | Unstandardized Coefficients |            | Standardized Coefficients | t      | Sig.  | Correlations Zero-order | Collinearity Statistics |        |
|                           |                                        | B                           | Std. Error | Beta                      |        |       |                         | Tolerance               | VIF    |
| 1                         | (Constant)                             | -0.426                      | 0.151      |                           | -2.811 | 0.005 |                         |                         |        |
|                           | DRR, Vulnerability and Spatial Mapping | 0.205                       | 0.048      | 0.276                     | 4.304  | 0     | 0.815                   | 0.114                   | 8.747  |
|                           | Regulation of Rights                   | 0.327                       | 0.046      | 0.453                     | 7.042  | 0     | 0.842                   | 0.113                   | 8.836  |
|                           | Climate Smart Practices                | -0.179                      | 0.061      | -0.231                    | -2.952 | 0.003 | 0.766                   | 0.076                   | 13.085 |
|                           | Technological Innovation               | 0.125                       | 0.08       | 0.134                     | 1.561  | 0.119 | 0.77                    | 0.064                   | 15.675 |
|                           | Climate Organization                   | 0.23                        | 0.076      | 0.267                     | 3.044  | 0.003 | 0.828                   | 0.061                   | 16.376 |

|                                     |        |       |        |        |   |       |       |       |
|-------------------------------------|--------|-------|--------|--------|---|-------|-------|-------|
| Institutional Effectiveness         | 0.447  | 0.056 | 0.484  | 8.012  | 0 | 0.811 | 0.129 | 7.779 |
| Climate Infrastructure              | -0.41  | 0.055 | -0.335 | -7.408 | 0 | 0.447 | 0.229 | 4.374 |
| Agriculture, Water and Energy Nexus | -0.187 | 0.048 | -0.219 | -3.874 | 0 | 0.727 | 0.147 | 6.795 |

a. Dependent Variable: Sustainability

**Table S9:** Regression's Residual Statistics for GC-1 of Agriculture Sector

| <b>Residuals Statistics<sup>a</sup></b> |          |         |        |                |     |
|-----------------------------------------|----------|---------|--------|----------------|-----|
|                                         | Minimum  | Maximum | Mean   | Std. Deviation | N   |
| Predicted Value                         | .4579    | 5.5407  | 2.4600 | .95972         | 357 |
| Residual                                | -1.06906 | 1.31972 | .00000 | .42384         | 357 |
| Std. Predicted Value                    | -2.086   | 3.210   | .000   | 1.000          | 357 |
| Std. Residual                           | -2.494   | 3.079   | .000   | .989           | 357 |

a. Dependent Variable: Sustainability
